# Supplementary material
Source: PubMed Central journal article supplement (PMC2810552)
Supplement: NIHMS133546-supplement-1_si_001.pdf [file NIHMS133546-supplement-1_si_001.pdf]

## Supporting Information

### Investigation of the Relative Cellular Permeability of DNA-binding Pyrrole- Imidazole Polyamides

Bo Liu and Thomas Kodadek

Contents of Supporting Information:

|                                                                                                                                         |       |
|-----------------------------------------------------------------------------------------------------------------------------------------|-------|
| Figure S1. Relative GRLBD binding affinities of Py-Im polyamide dexamethasone conjugates determined by fluorescence polarization assay. | S2-S4 |
| Figure S2. Dose dependent luciferase activities induced by Py-Im polyamide – Sdex conjugates in breast cancer MCF7 cells.               | S5    |
| Figure S3. $^1\text{H}$ NMR spectrum of Sdex-isothiocyanate ( <b>3</b> ).                                                               | S6    |
| Figure S4. $^{13}\text{C}$ NMR spectrum of Sdex-isothiocyanate ( <b>3</b> ).                                                            | S7    |

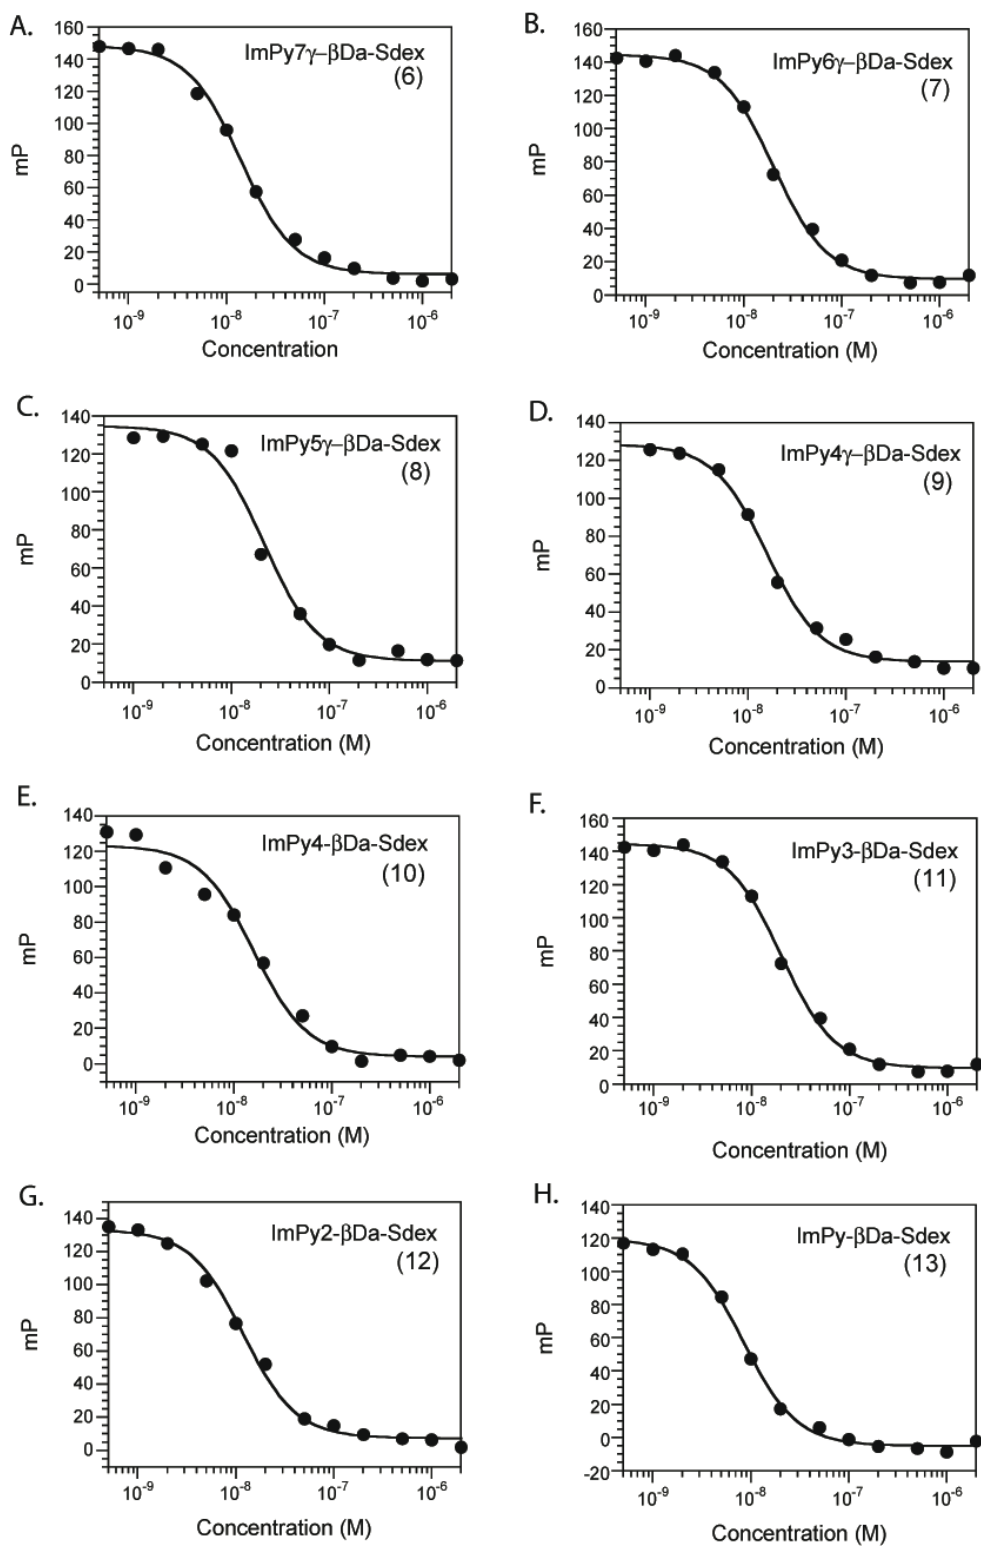

Figure S1. Relative GRLBD binding affinities of Py-Im polyamide dexamethasone conjugates determined by fluorescence polarization assay.

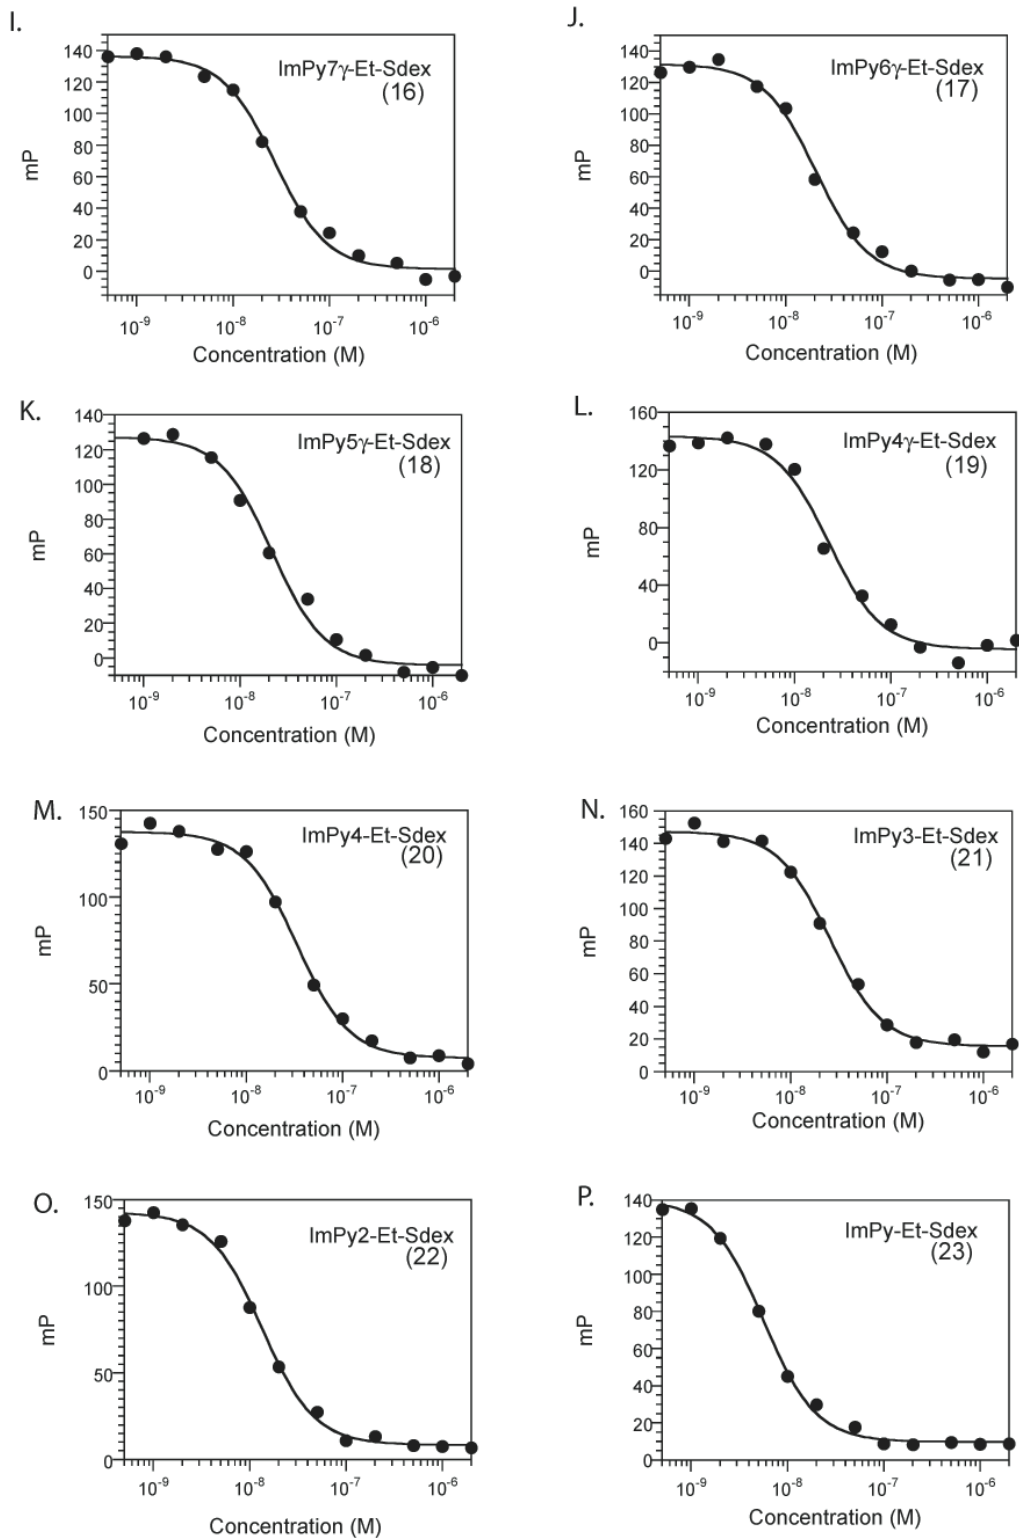

Figure S1 (continue)

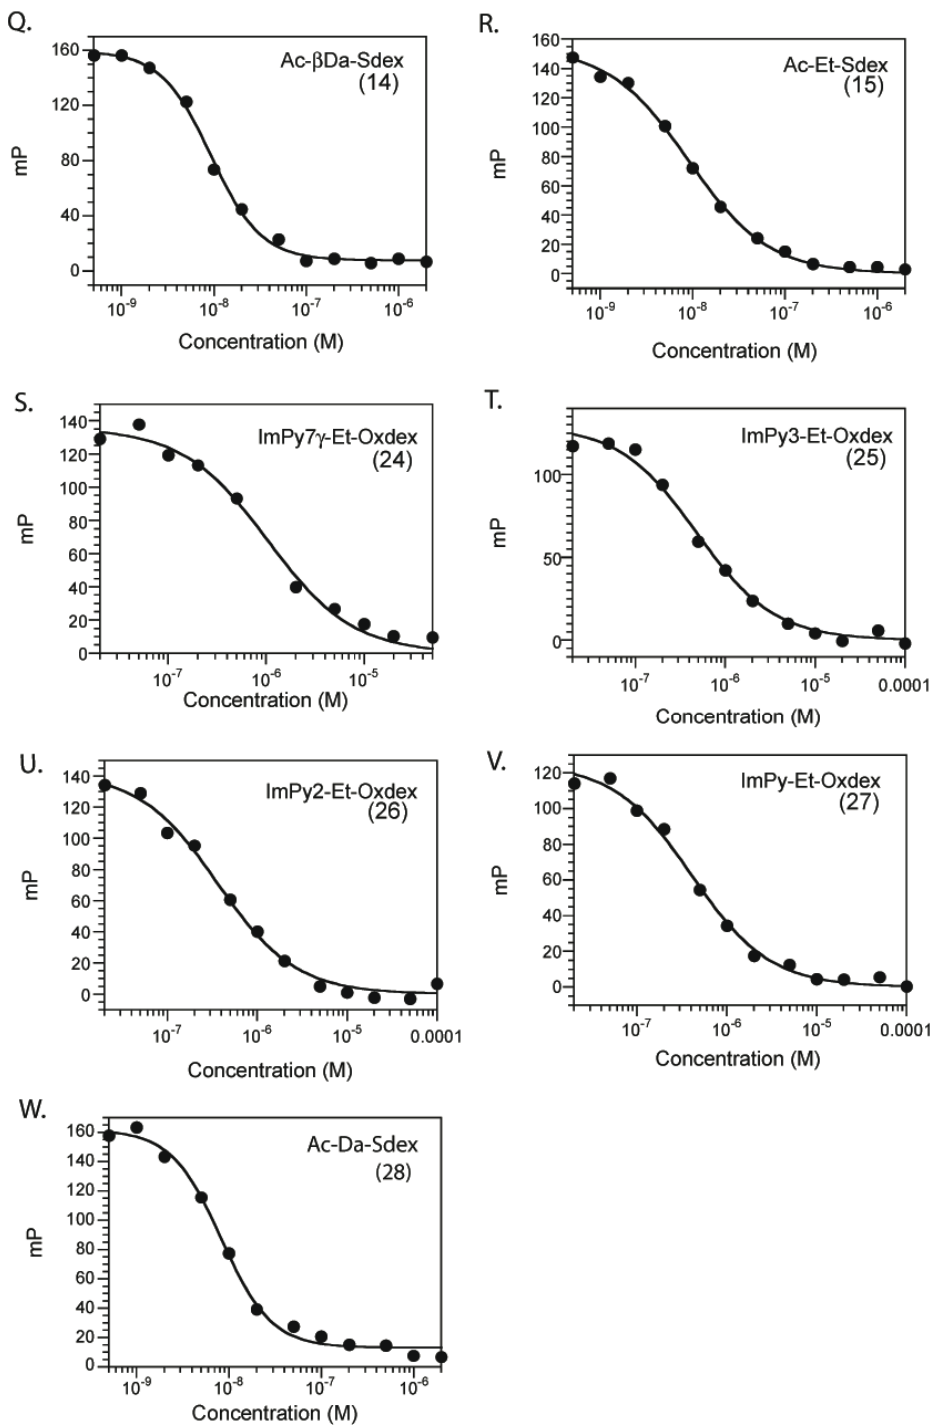

Figure S1 (continue)

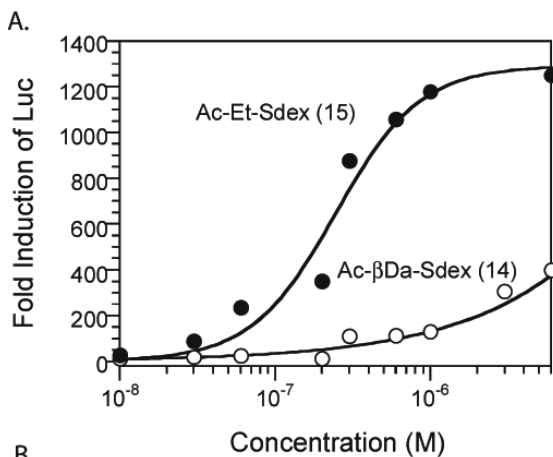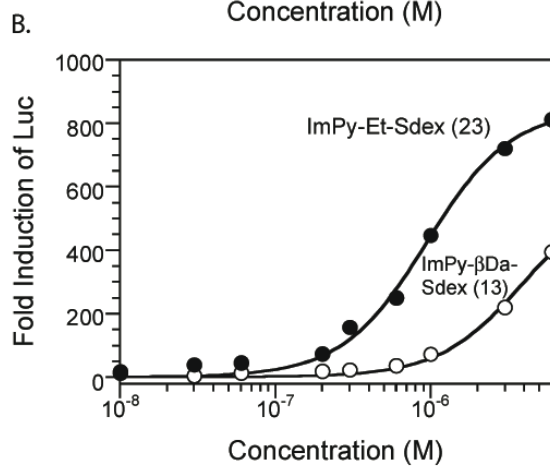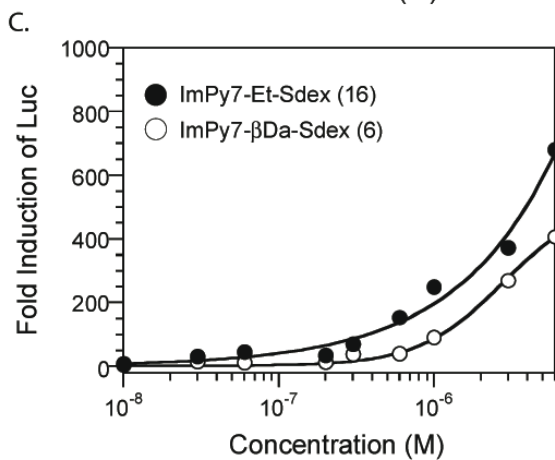

Figure S2. Dose dependent luciferase activities induced by Py-Im polyamide – Sdex conjugates in breast cancer MCF7 cells. A. Comparison between **15** (●) and **14** (○). B. Comparison between **23** (●) and **13** (○). C. Comparison between **16** (●) and **6** (○).

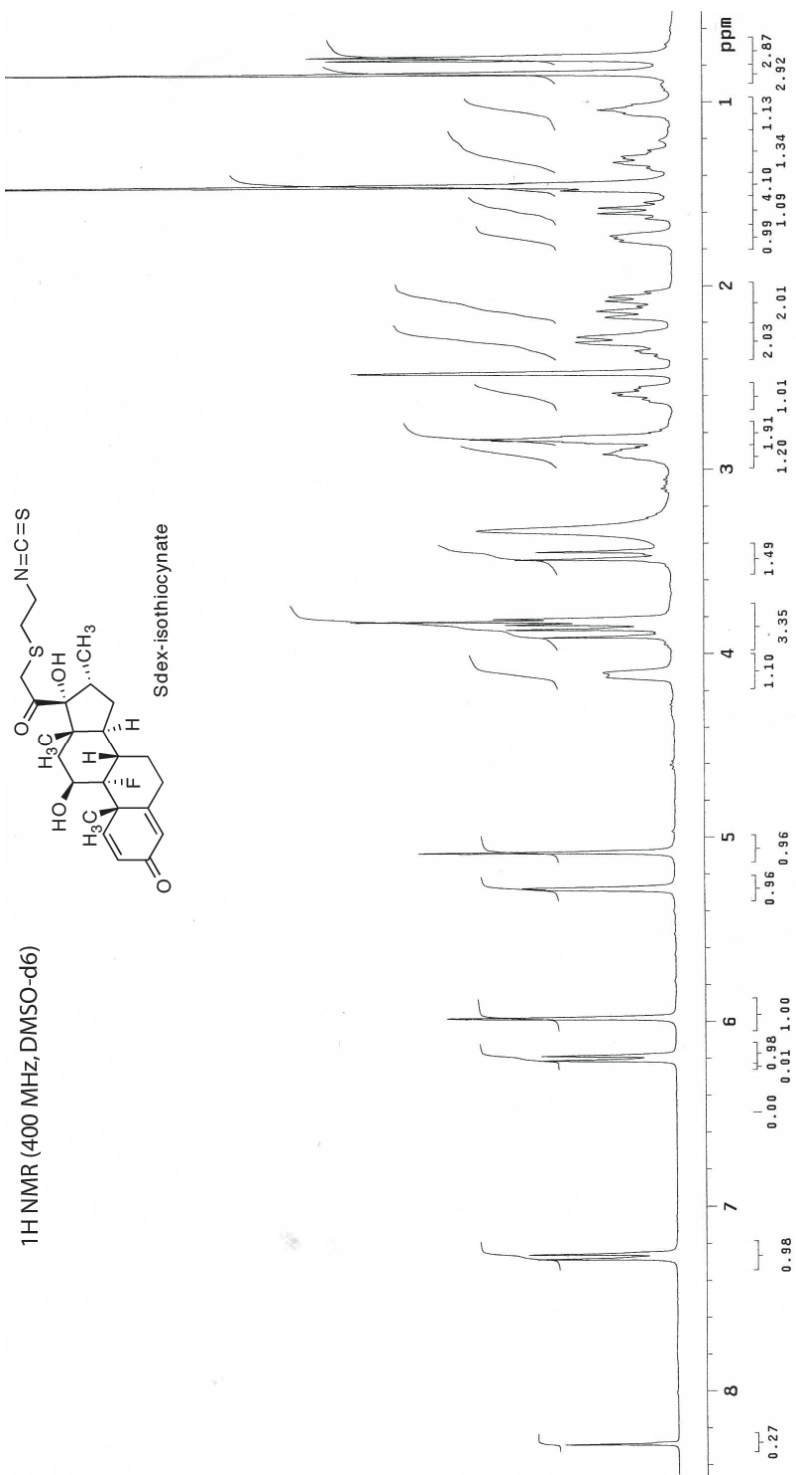

Figure S3. <sup>1</sup>H NMR spectrum of Sdex-isothiocyanate (**3**).

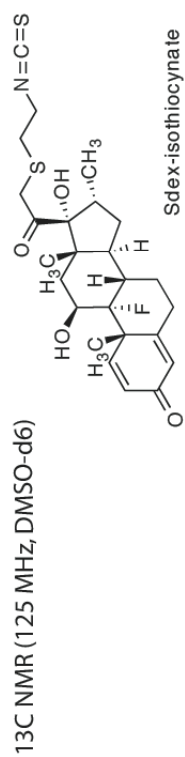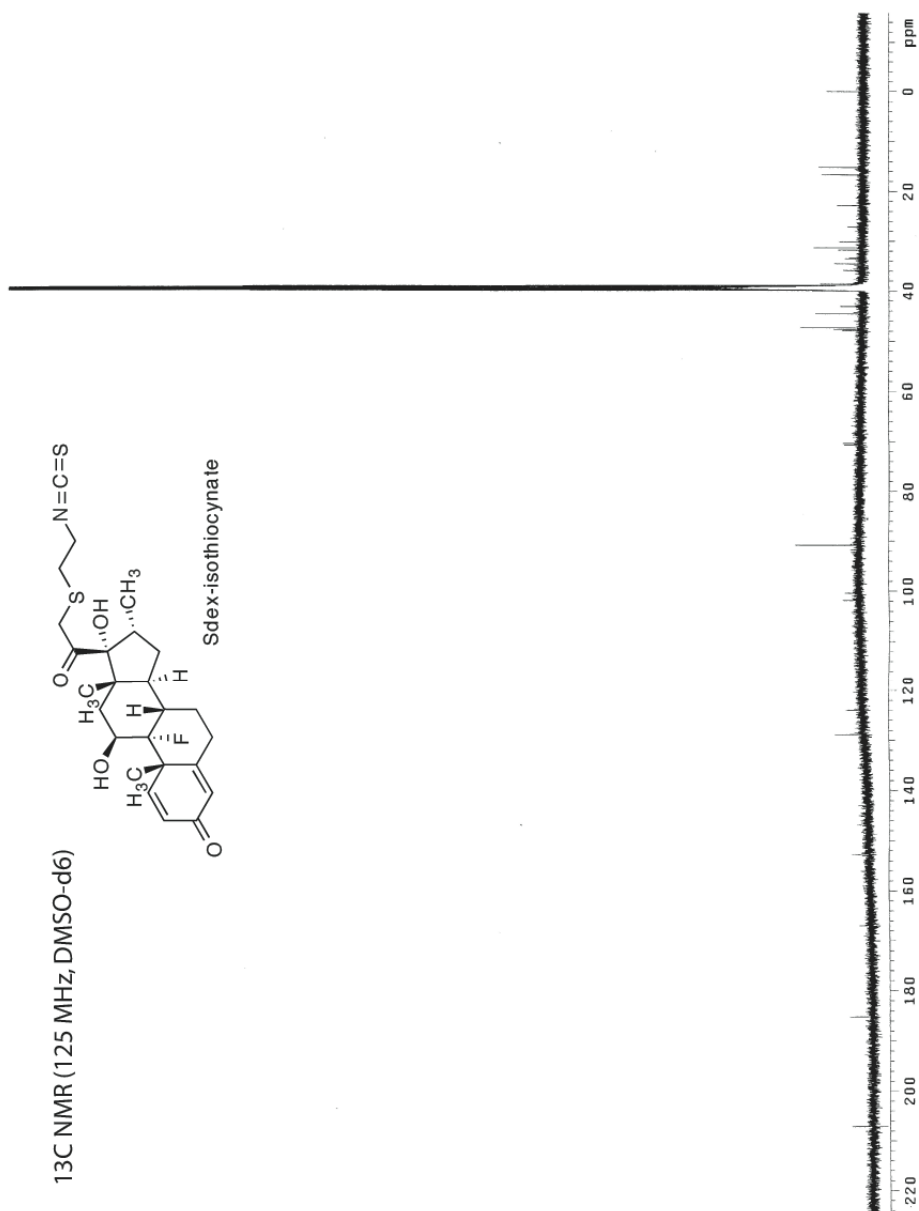

Figure S4.  $^{13}\text{C}$  NMR spectrum of Sdex-isothiocyanate (**3**)
